# Supplementary material
Source: ML conference proceedings conference paper supplement (https://openreview.net/forum?id=4KRERpdVDC)

$$\mu = 0$$

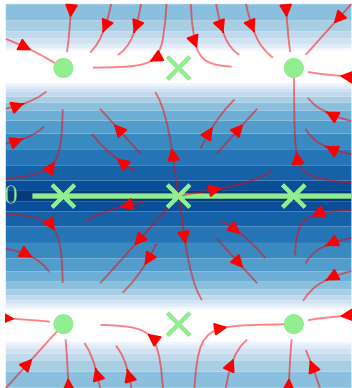

$$\mu = 0.5$$

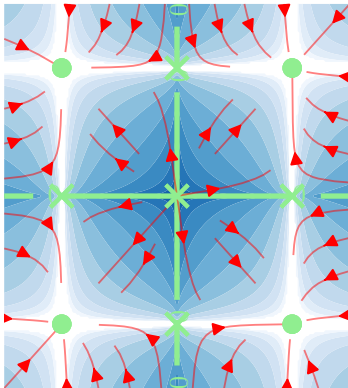

$$\mu = 1$$

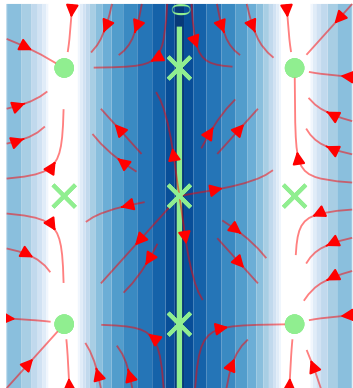

Supplement: supplementary_material [file KEF_degeneracy.pdf › supplementary/separatrixLocatorneurips/plots_for_publication/KEF_degeneracy.pdf]

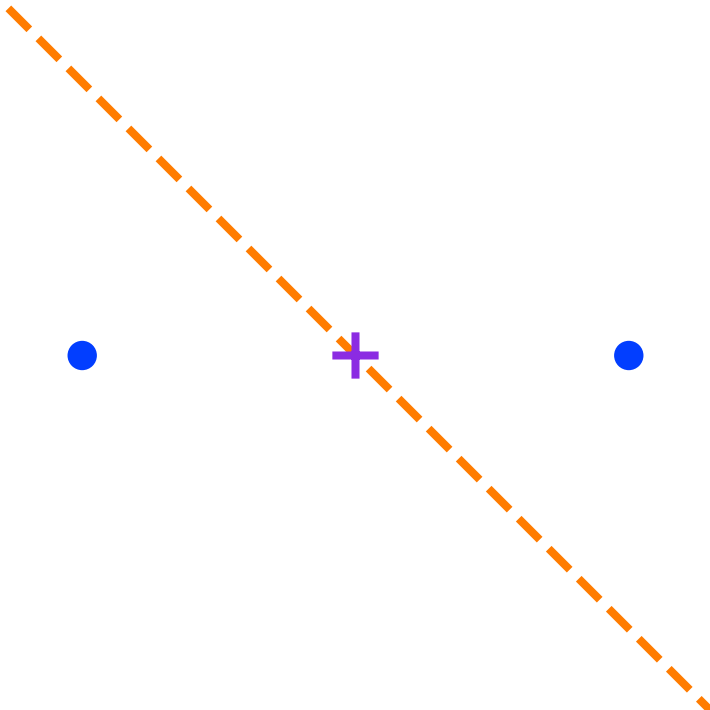

Supplement: supplementary_material [file cartoon_plot.pdf › supplementary/separatrixLocatorneurips/plots_for_publication/cartoon_plot.pdf]

$$\dot{x} = f(x)$$

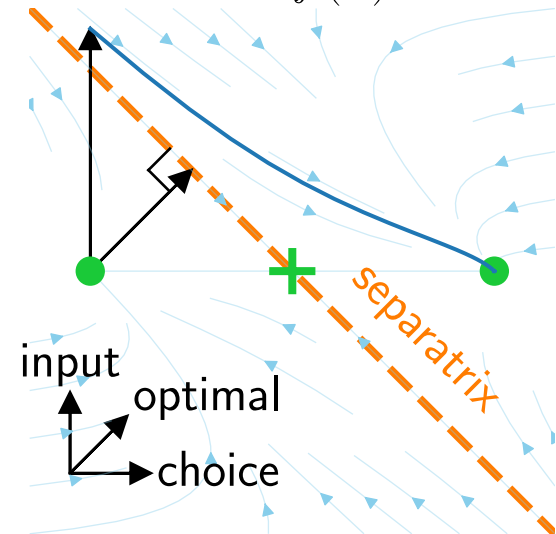

$$q(x) := \|f(x)\|^2$$

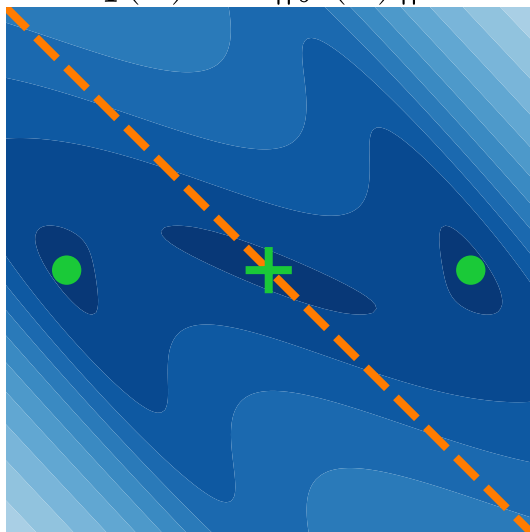

$$\psi(x) := ?$$

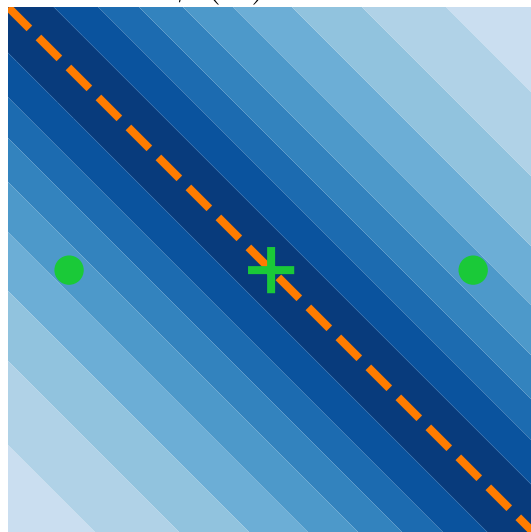

Supplement: supplementary_material [file cartoon_subplots.pdf › supplementary/separatrixLocatorneurips/plots_for_publication/cartoon_subplots.pdf]

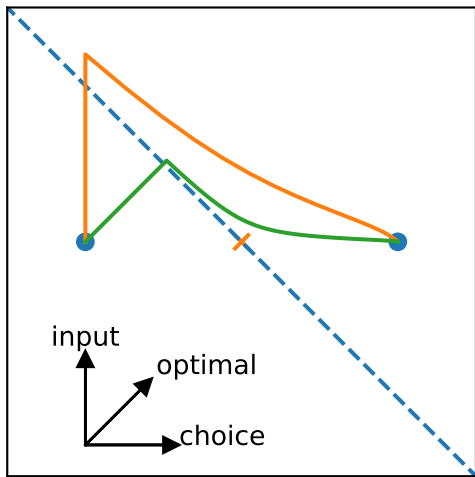

Kinetic energy  $\frac{1}{2} \|f(x)\|^2$

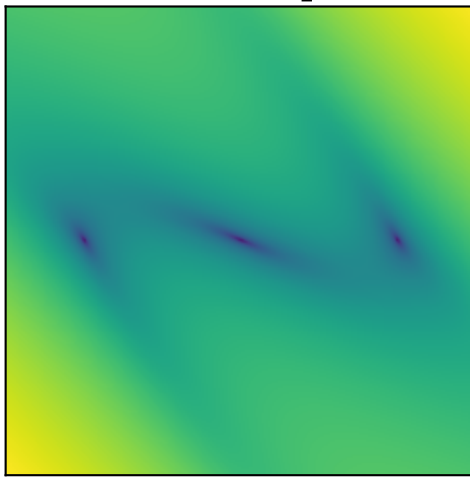

$\psi(x)$

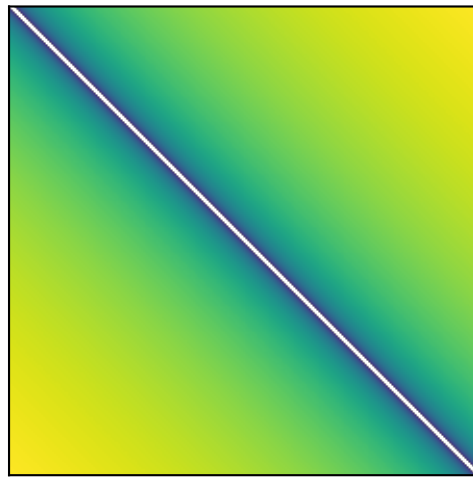

Supplement: supplementary_material [file fig1.pdf › supplementary/separatrixLocatorneurips/plots_for_publication/fig1.pdf]

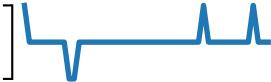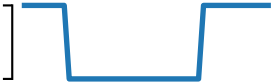

Supplement: supplementary_material [file flip_flop_io.pdf › supplementary/separatrixLocatorneurips/plots_for_publication/flip_flop_io.pdf]

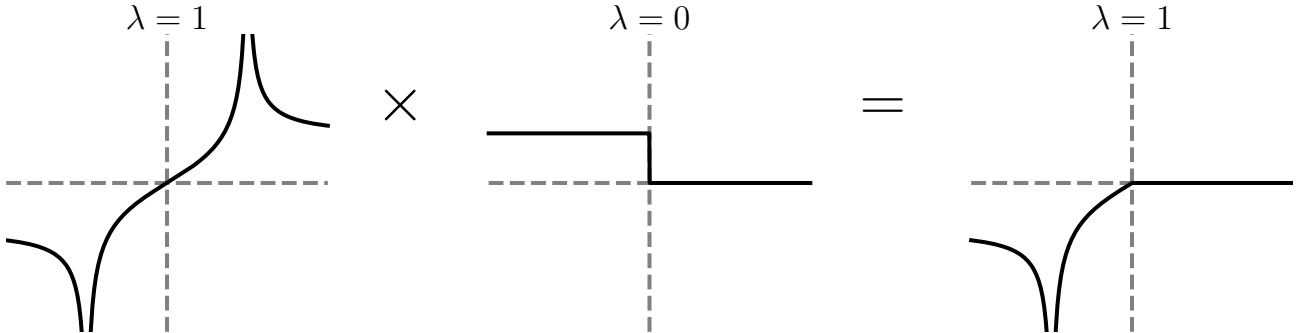

Supplement: supplementary_material [file product_rule.pdf › supplementary/separatrixLocatorneurips/plots_for_publication/product_rule.pdf]

$q(x)$

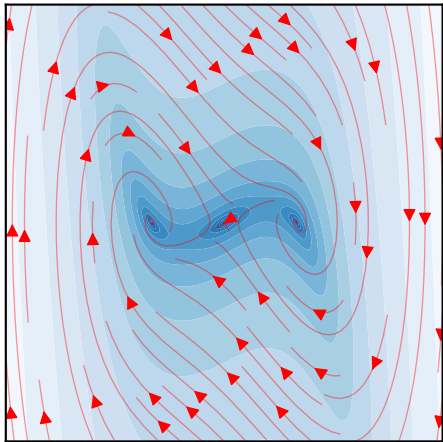

$\psi(x)$

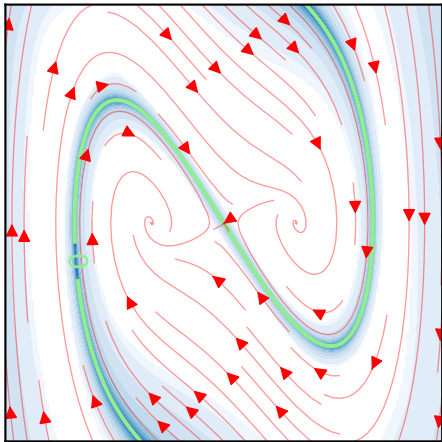

Supplement: supplementary_material [file results2D.pdf › supplementary/separatrixLocatorneurips/plots_for_publication/results2D.pdf]

$q(x)$ 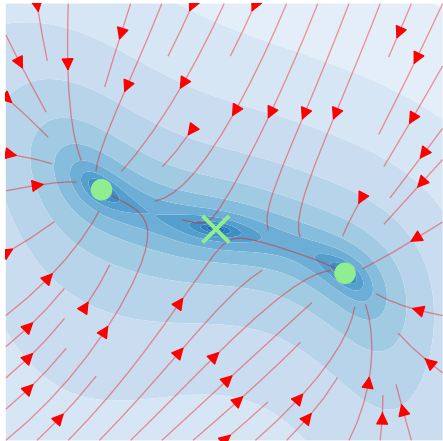 $\psi(x)$ 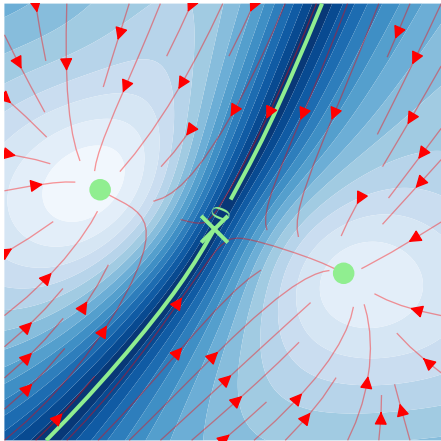

Supplement: supplementary_material [file results2D_1bitFlipFlop_GRU2.pdf › supplementary/separatrixLocatorneurips/plots_for_publication/results2D_1bitFlipFlop_GRU2.pdf]

$q(x)$

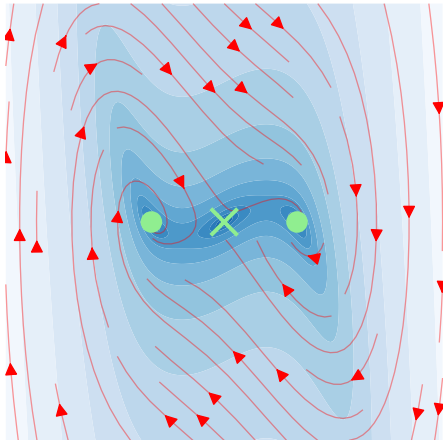

$\psi(x)$

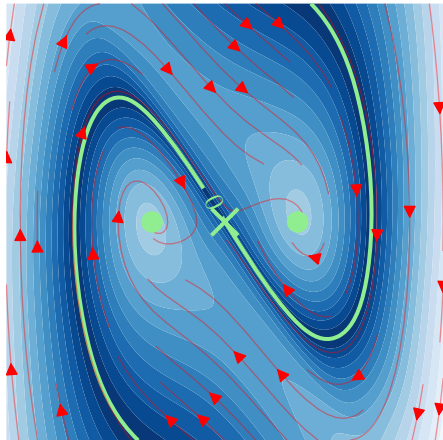

Supplement: supplementary_material [file results2D_duffing.pdf › supplementary/separatrixLocatorneurips/plots_for_publication/results2D_duffing.pdf]

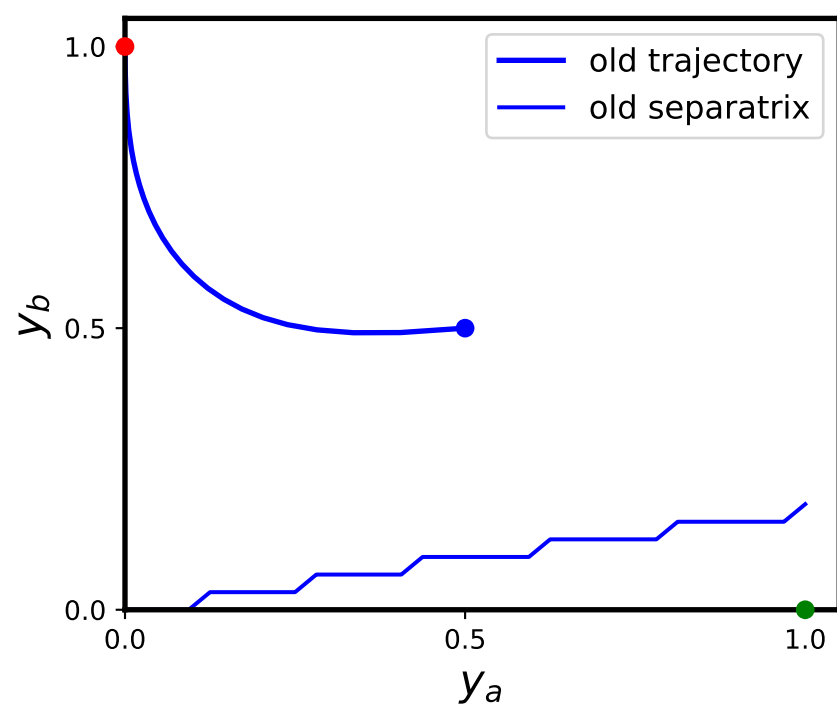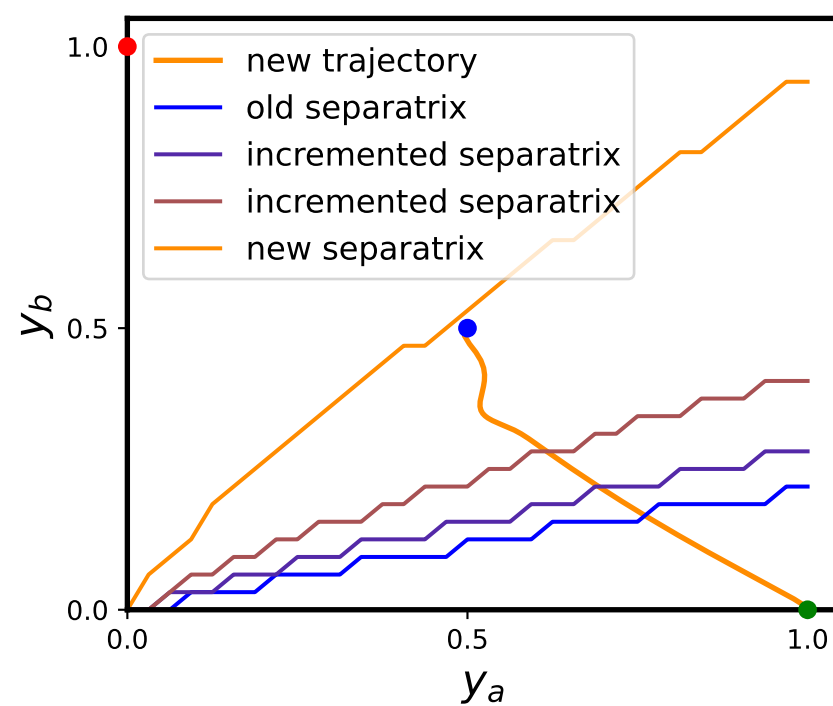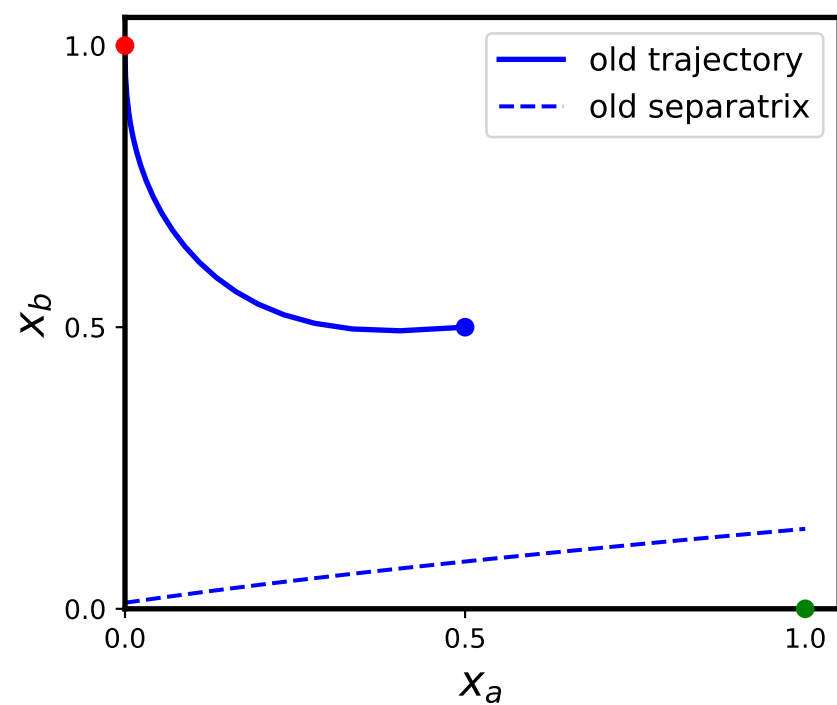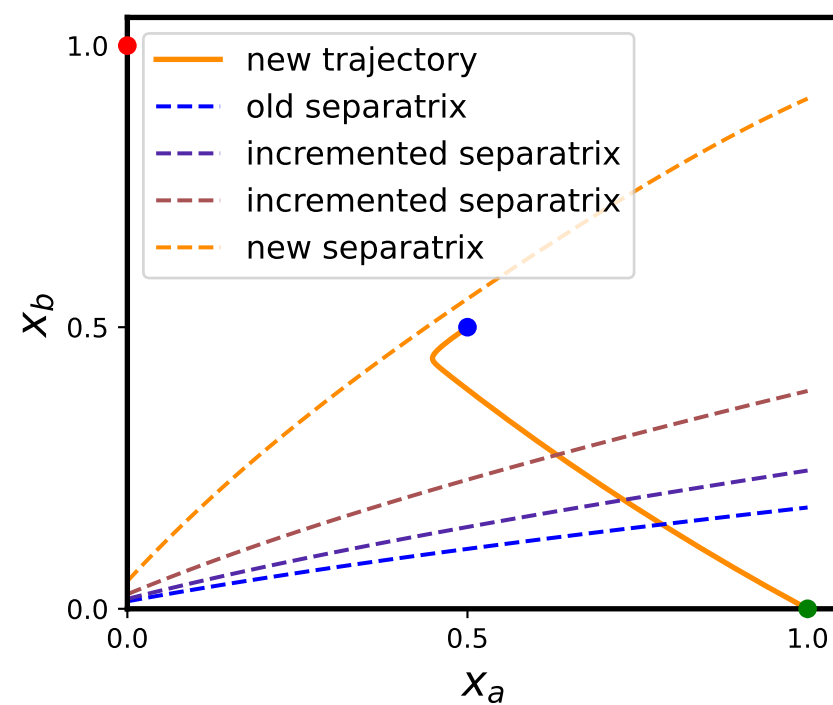

Supplement: supplementary_material [file SPARC_demo.pdf › supplementary/separatrixLocatorneurips/ssr_module/SPARC_demo.pdf]

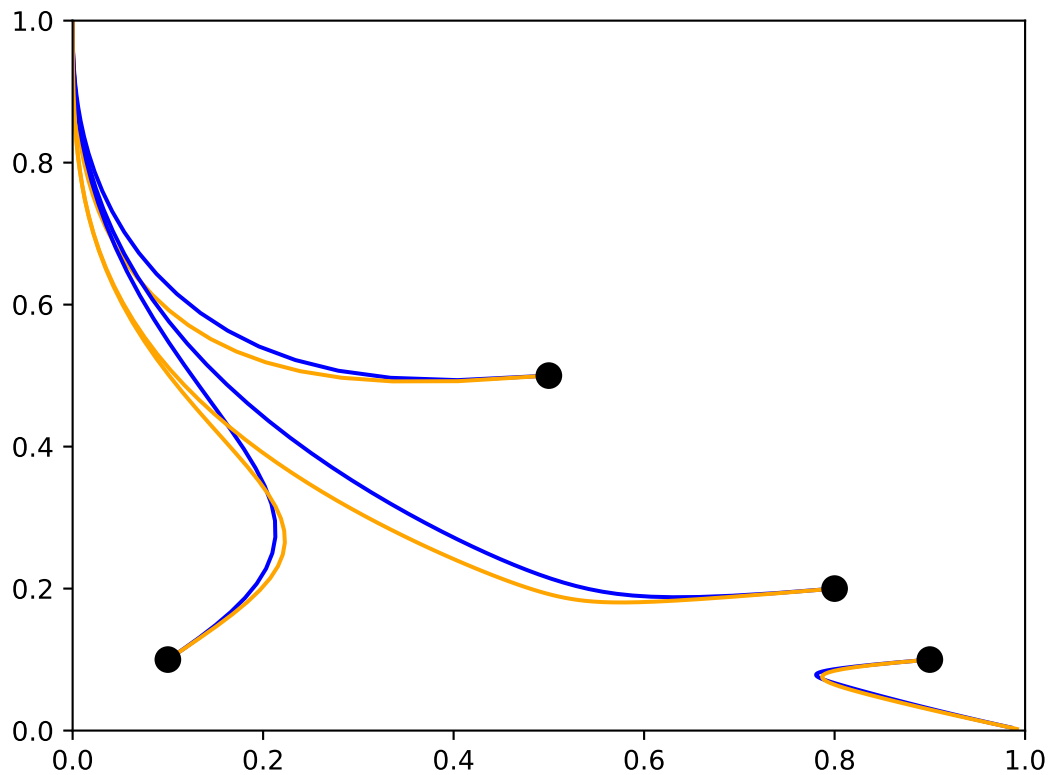

Supplement: supplementary_material [file SSR_demo_1.pdf › supplementary/separatrixLocatorneurips/ssr_module/SSR_demo_1.pdf]

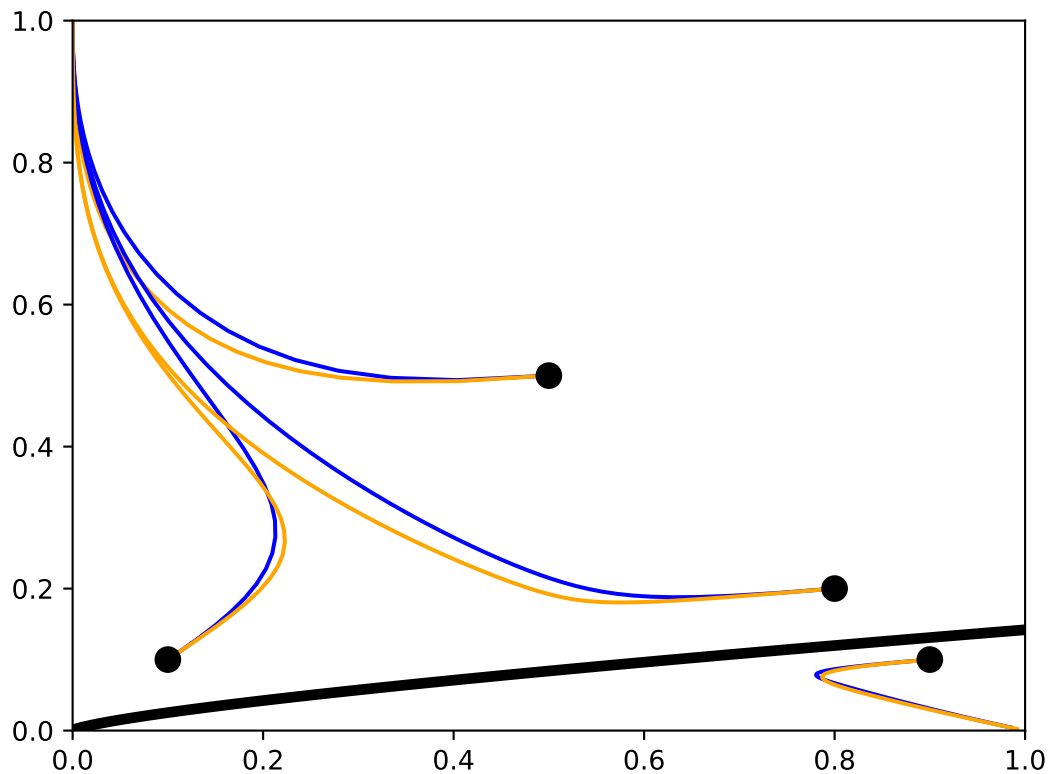

Supplement: supplementary_material [file SSR_demo_2.pdf › supplementary/separatrixLocatorneurips/ssr_module/SSR_demo_2.pdf]

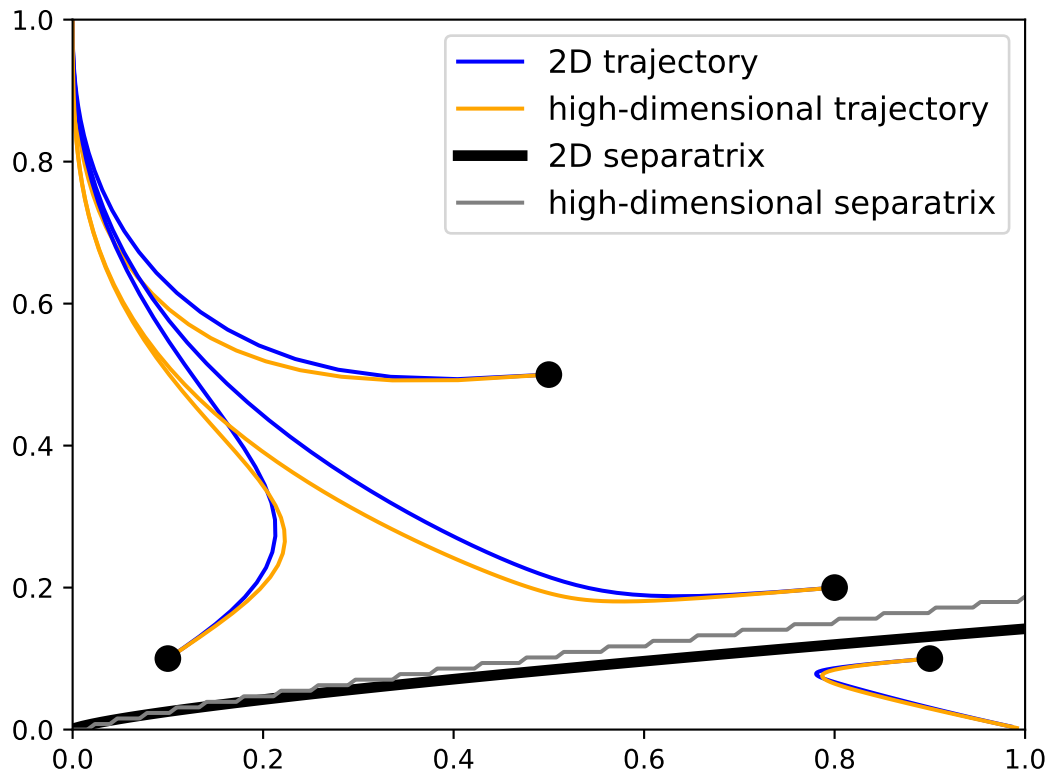

Supplement: supplementary_material [file SSR_demo_3.pdf › supplementary/separatrixLocatorneurips/ssr_module/SSR_demo_3.pdf]
